# **Thermal decomposition of the amino acids glycine, cysteine, aspartic acid, asparagine, glutamic acid, glutamine, arginine and histidine**

Ingrid M. Weiss\*, Christina Muth, Robert Drumm & Helmut O.K. Kirchner

INM-Leibniz Institute for New Materials, Campus D2 2, D-66123 Saarbruecken Germany

\*Present address: Universität Stuttgart, Institut für Biomaterialien und biomolekulare Systeme, Pfaffenwaldring 57, D-70569 Stuttgart, Germany

## **Abstract**

Calorimetry, thermogravimetry and mass spectrometry were used to follow the thermal decomposition of the eight amino acids G, C, D, N, E, Q, R and H between 185°C and 280°C. Endothermic heats of decomposition between 72 and 151 kJ/mol are needed to form 12 to 70 % volatile products. This process is neither melting nor sublimation. With exception of cysteine they emit mainly H<sub>2</sub>O, some NH<sub>3</sub> and no CO<sub>2</sub>. Cysteine produces CO<sub>2</sub> and little else. The reactions are described by polynomials, AA → a (NH<sub>3</sub>) + b (H<sub>2</sub>O) + c (CO<sub>2</sub>) + d (H<sub>2</sub>S) + e (residue), with integer or half integer coefficients. The solid monomolecular residues are rich in peptide bonds.

## **1. Motivation**

Amino acids might have been synthesized under prebiological conditions on earth or deposited on earth from interstellar space, where they have been found [Follmann and Brownson, 2009]. Robustness of amino acids against extreme conditions is required for early occurrence, but little is known about their nonbiological thermal destruction. There is hope that one might learn something about the molecules needed in synthesis from the products found in decomposition. Our experimental approach is not biochemical, it is merely thermochemical.

## **2. Experimental procedures**

### **2.1 DSC, TGA, QMS**

Altogether 200 samples of amino acids of at least 99.99 % purity from Sigma-Aldrich were tested in a Simultaneous thermal analysis apparatus STA 449 Jupiter (Netzsch, Selb, Germany) coupled with Mass spectrometer QMS 403C Aëolos (Netzsch). Specimens of typically 10 mg weight in Al cans were evacuated and then heated at 5K/min in argon flow. Differential scanning calorimetry (DSC) and thermal gravimetric analysis / thermogravimetry (TGA, TG), as well as quantitative mass spectrometry (QMS) outputs were smoothed to obtain the data of section 3.1. The mass spectrometer scanned 290 times between 30°C and 320°C, i.e. at every single degree in 1 Da steps between 1 Da and 100 Da. Altogether, 290 x 100 x 200 = 5.8 million data points were analyzed.

### **2.2 Visuals**

A MPA120 EZ-Melt Automated Melting Point Apparatus (Stanford Research Systems, Sunnyvale, CA, U.S.A.) equipped with a CAMCORDER GZ-EX210 (JVC, Bad Vilbel, Germany) was used for the optical observations. The same heating rate of 5 K/min was employed, but without inert gas protection. Screen shot images were extracted from continuous videos registered from 160 to 320 °C, for all amino acids significant moments are shown in section 3.

### 3. Experimental results

#### 3.1 Data

Although we examined all 20 amino acids, we report results for those eight of them, for which the sum of the volatile gases, NH<sub>3</sub>, H<sub>2</sub>O, CO<sub>2</sub> and H<sub>2</sub>S, matched the mass loss registered by thermogravimetry (TG). For each amino acid we show the skeleton structure, the optical observations, the DSC signal in red and the TG signal in black, as well as the ion currents for important channels, quantitatively significant are only the 17 Da (NH<sub>3</sub>, green lines), 18 Da (H<sub>2</sub>O, blue lines), and 44 Da (CO<sub>2</sub>, grey lines) signals. The logarithmic scale overemphasizes the molecular weights. The DSC data are given in W/g, the TG data in percent. The QMS data are ion currents [A] per sample.

##### 3.1.1 Glycine, Gly, G, C<sub>2</sub>H<sub>5</sub>NO<sub>2</sub>, 75 Da, H<sub>f</sub> = -528 kJ/mol

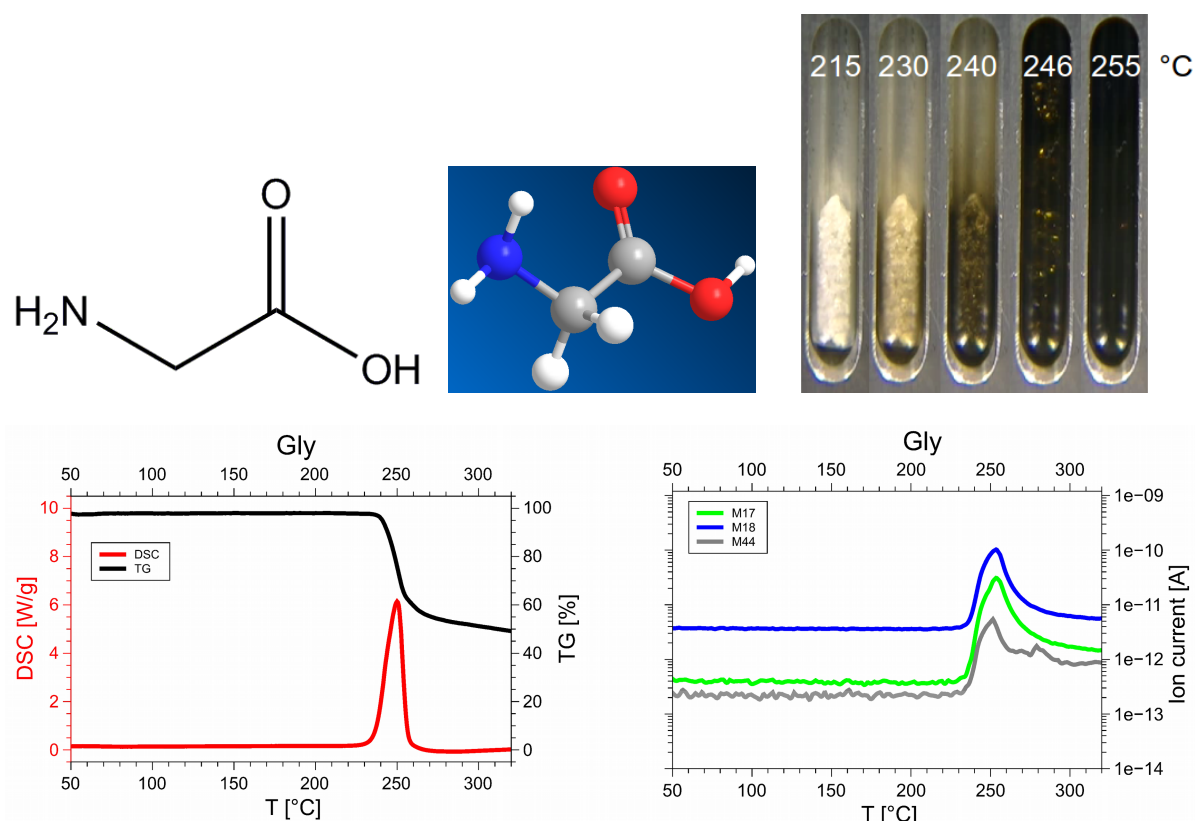

Figure 3.1.1, Glycine data

### 3.1.2 Cysteine, Cys, C, C<sub>3</sub>H<sub>7</sub>NO<sub>2</sub>S: 121 Da, H<sub>f</sub> = -534 kJ/mol

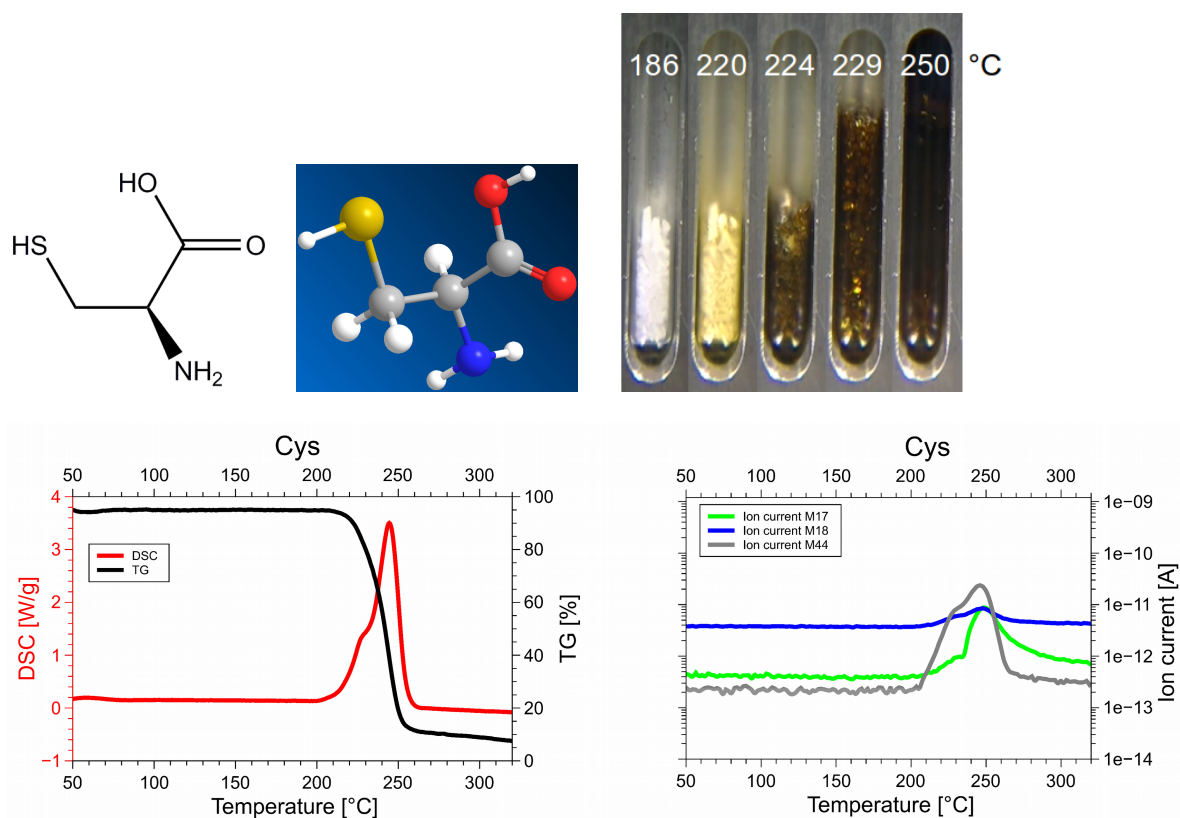

Figure 3.1.2, Cysteine data

### 3.1.3 Aspartic acid, Asp, D, C<sub>4</sub>H<sub>7</sub>NO<sub>4</sub>: 133 Da, H<sub>f</sub> = -973 kJ/mol

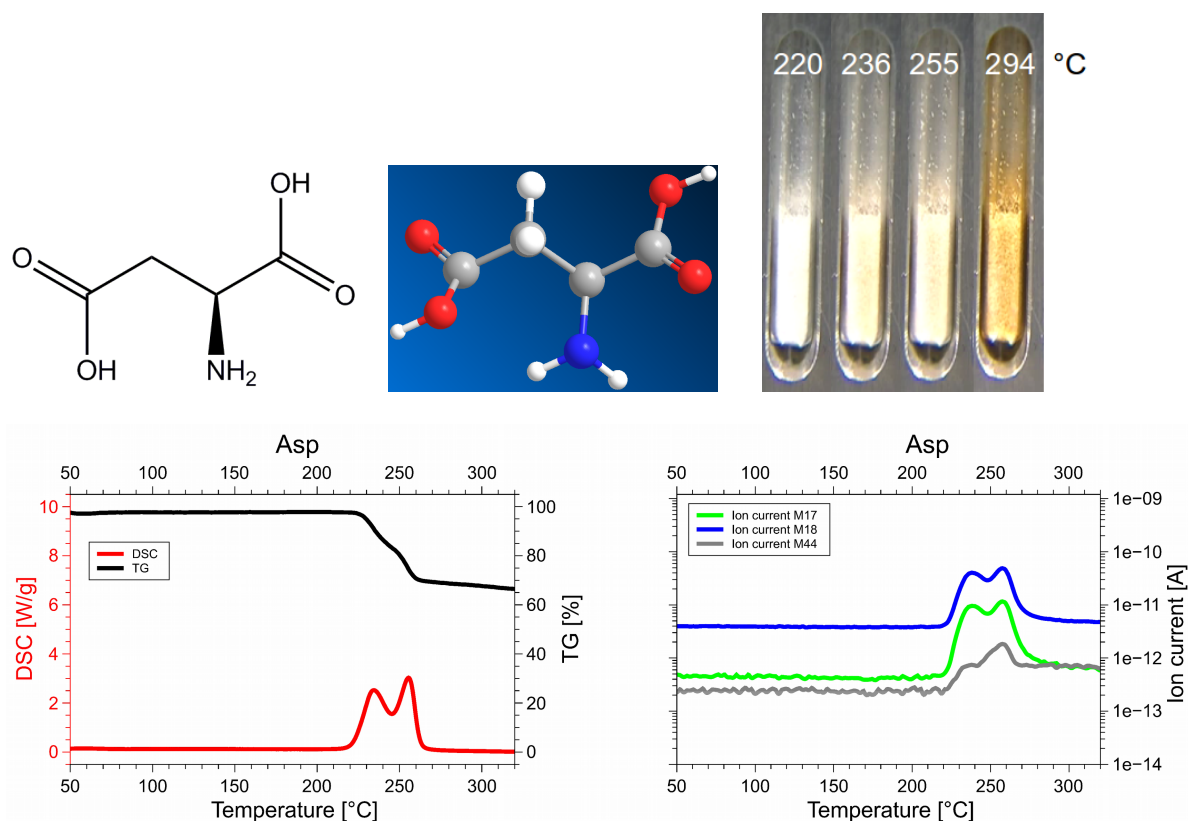

Figure 3.1.3, Aspartate data

3.1.4 Asparagine, Asn, N,  $C_4H_8N_2O_3$ : 132 Da,  $H_f = -789$  kJ/mol

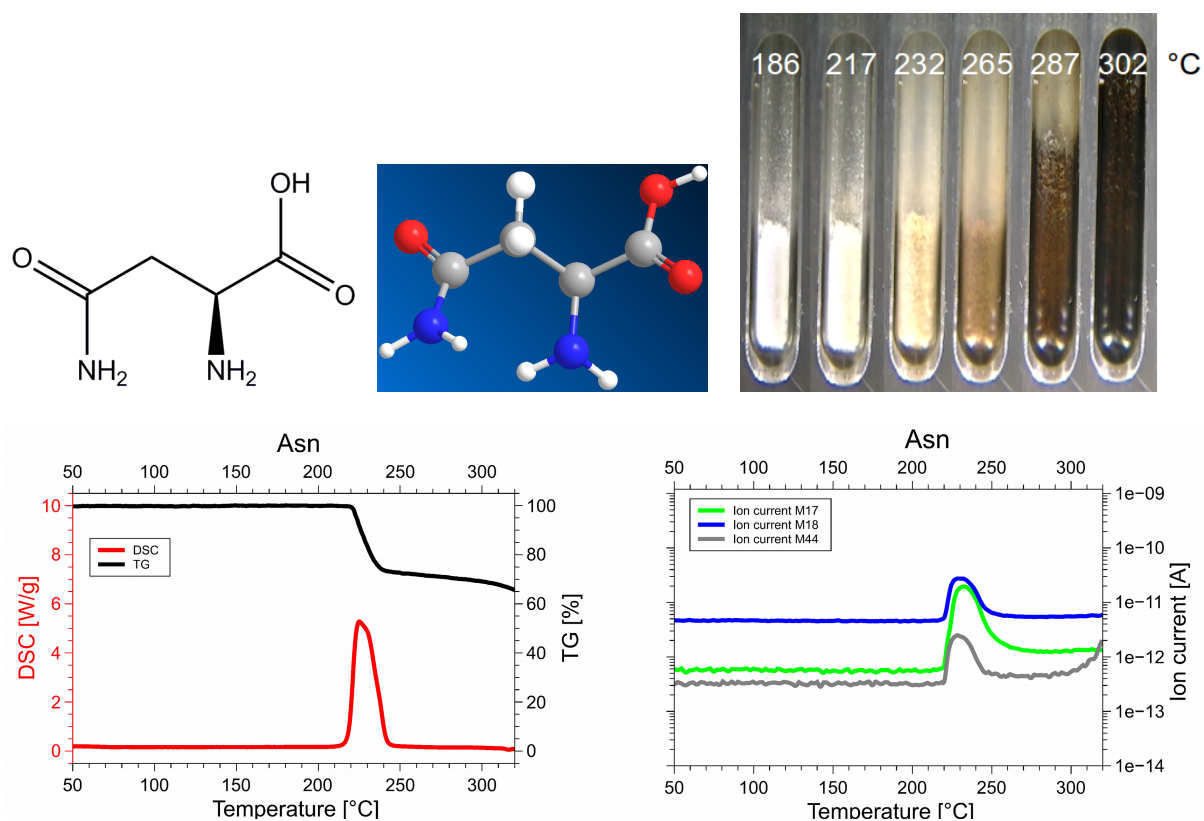

Figure 3.1.4, Asparagine data

3.1.5 Glutamic acid, Glu, E,  $C_5H_9NO_4$ : 147 Da,  $H_f = -1097$  kJ/mol

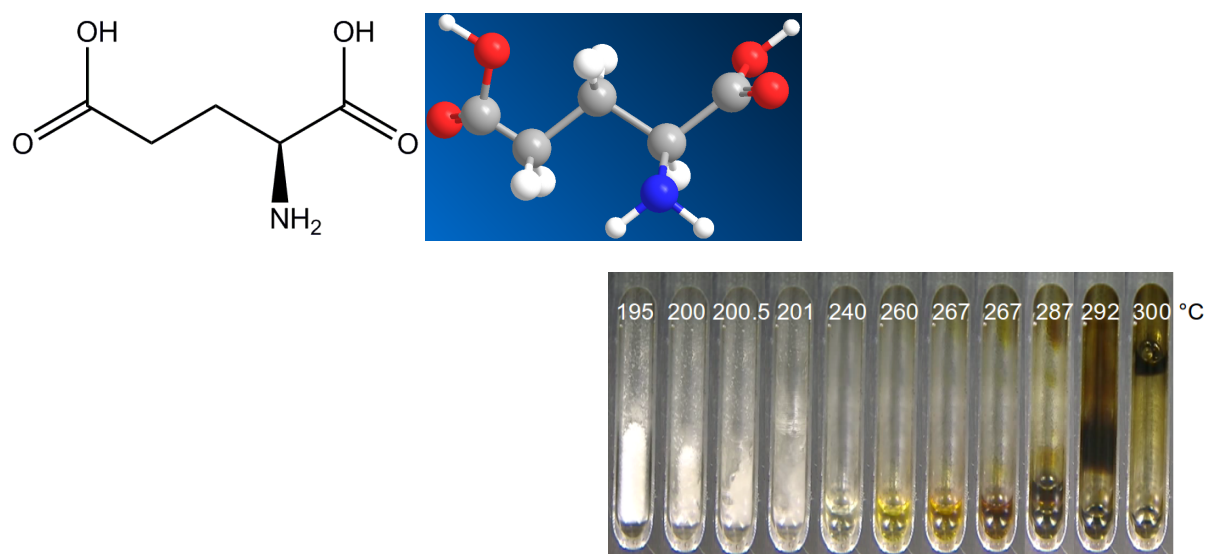

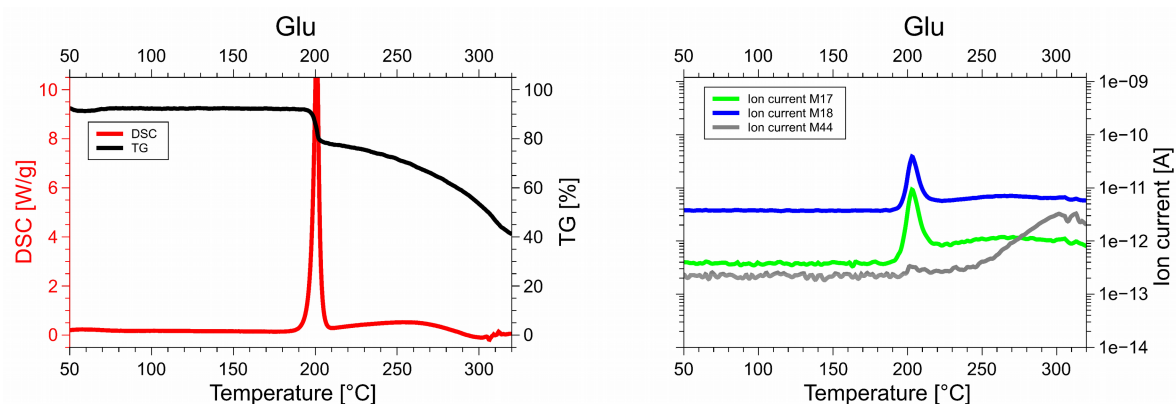

Figure 3.1.5, Glutamate data

### 3.1.6 Glutamine, Gln, Q, $C_5H_{10}N_2O_3$ : 146 Da, $H_f = -826$ kJ/mol

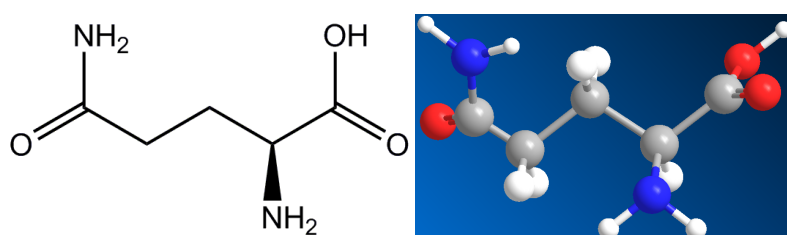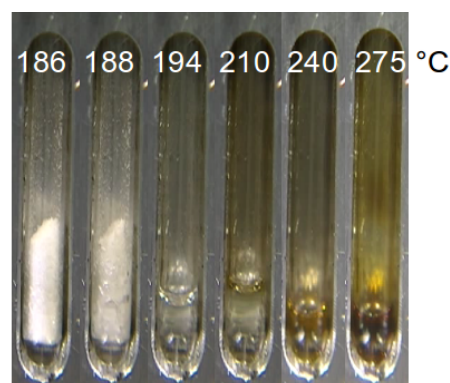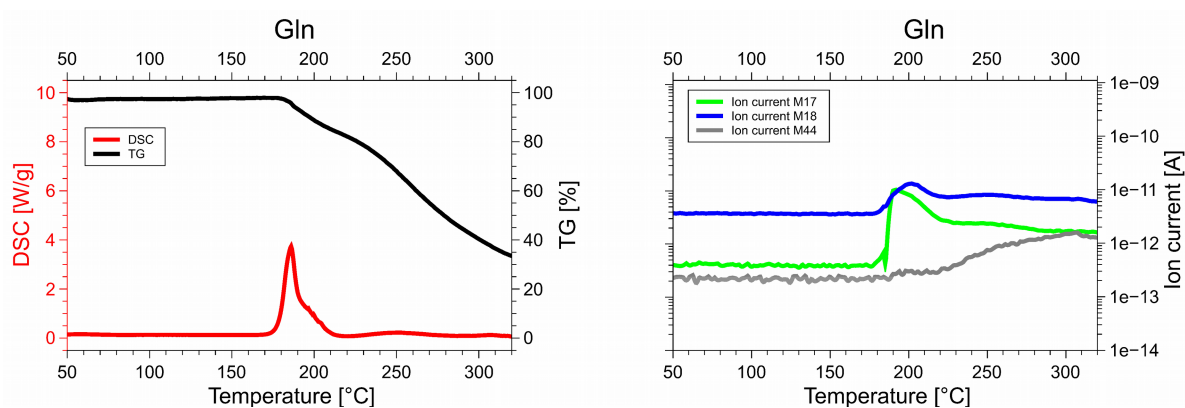

Figure 3.1.6, Glutamine data

### 3.1.7 Arginine, Arg, R, $C_6H_{14}N_4O_2$ : 174 Da, $H_f = -623$ kJ/mol

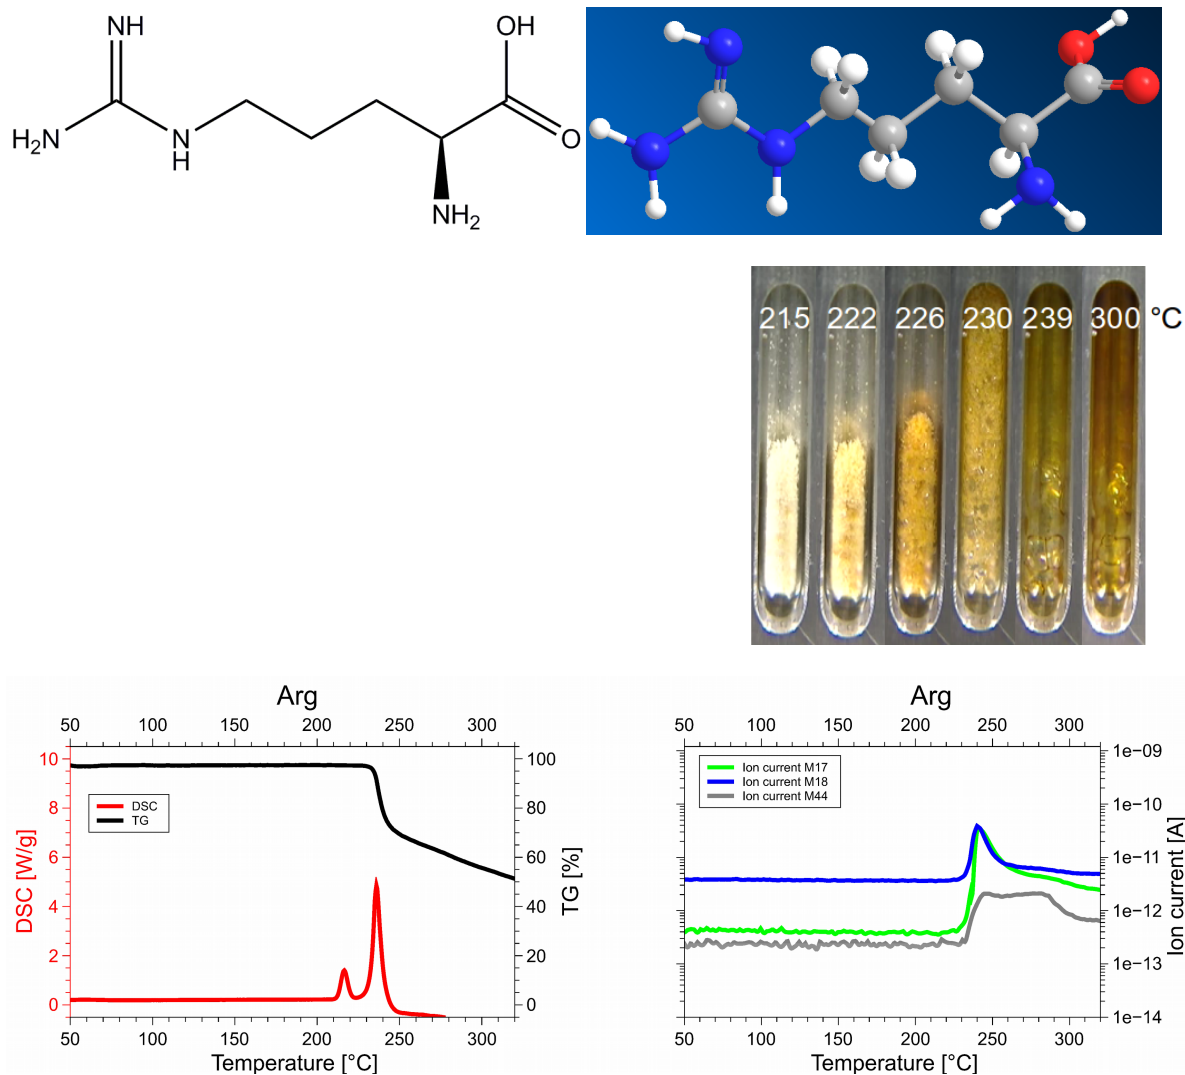

Figure 3.1.7, Arginine data

### 3.1.8 Histidine, His, $\text{H C}_6\text{H}_9\text{N}_3\text{O}_2$ : 155 Da $H_f = -467$ kJ/mol

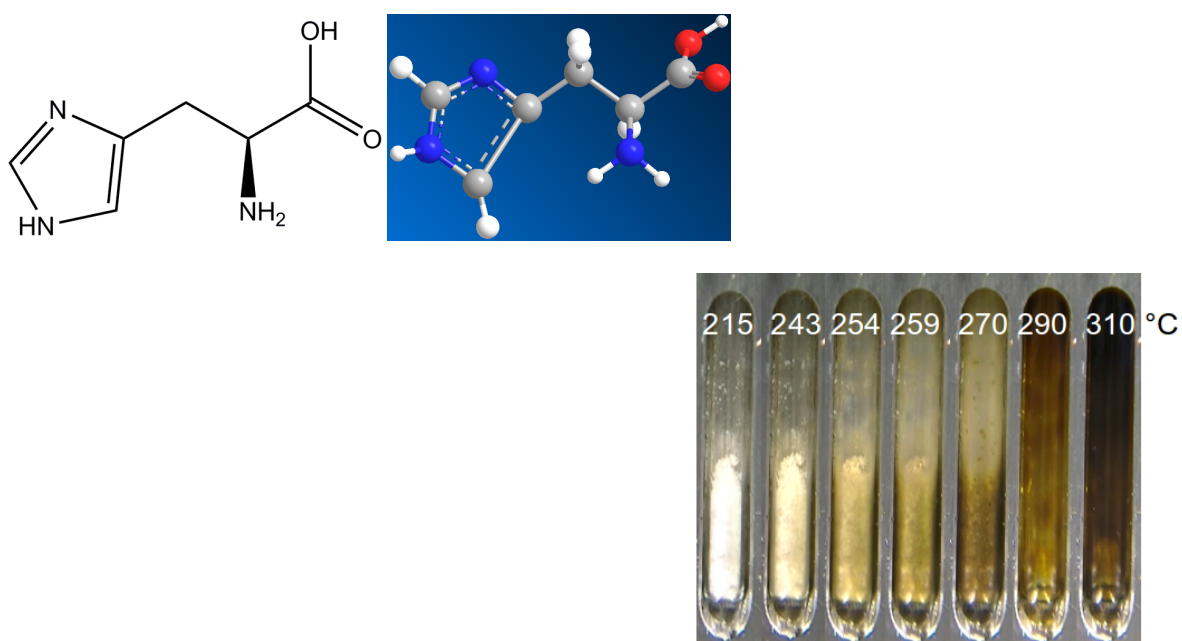

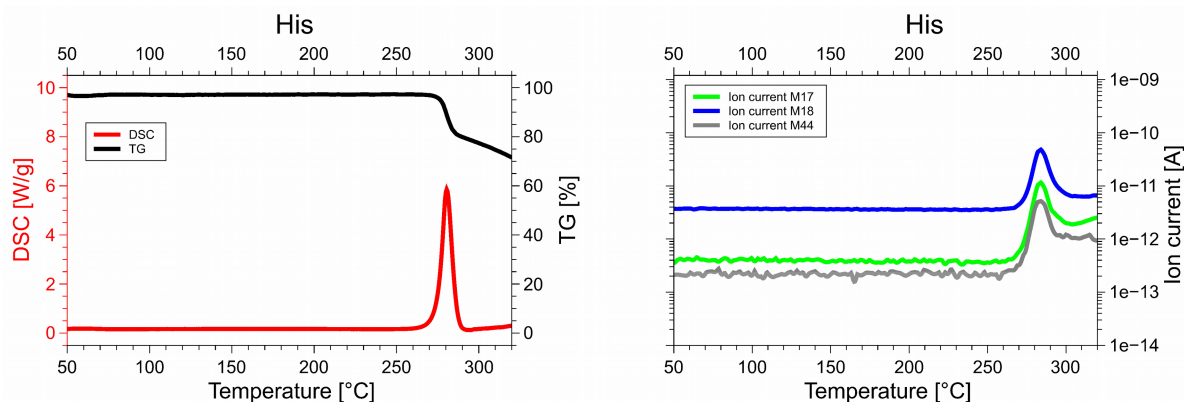

Figure 3.1.8, Histidine data

The DSC, TGA and QMS curves share one essential feature: In DSC there are peaks at a certain  $T_{\text{peak}}$  temperature for each amino acid, at the same temperatures they are accompanied by drops in TGA and QMS peaks. The simple fact that the DSC and QMS signals coincide in bell shaped peaks with the TGA drop proves that essentially one simple decomposition process takes place, there is not a spectrum of decomposition temperatures, as there would be for proteins. Qualitatively this proves that the process observed is neither melting nor sublimation (as claimed in the literature, [Acree and Chickos, 2010]). The observed process is decomposition, none of the eight amino acids exists in liquid form.

The optical observations, not obtained under vacuum but under some air access, are informative nevertheless. Solid/liquid transitions, with the liquid boiling heavily, coincide with the peak temperatures for Gly, Cys, Gln, Glu, Arg and His. Only for Asn and Asp there are solid/solid transformations at the peak temperatures. For Asn there is liquification at 280°C, Asp stays solid up to 320°C.

The DSC signals have the dimension of specific power [W/g], the QMS ones are ion currents of the order of pA. Integration over time, or, equivalently, temperature, gives the peak areas, which are specific energies [J/g] and ionic charges, of the order of pC. Reduction from specimen weights, typically 10 mg, to mol values is trivial. In absolute terms the ion currents and ionic charges are meaningless, because equipment dependent, calibration is needed. Only one reliable calibration substance was available, sodium bicarbonate ( $\text{NaHCO}_3$ ) = X1. It decomposes upon heating,

$2 \text{NaHCO}_3 \rightarrow \text{Na}_2\text{CO}_3 + \text{CO}_2 + \text{H}_2\text{O}$ . The  $\frac{1}{2} \text{CO}_2$  mol/mol  $\text{NaHCO}_3$  and  $\frac{1}{2} \text{H}_2\text{O}$  mol/mol  $\text{NaHCO}_3$  lines were quantitatively repeatable over months, in terms of pC/mol  $\text{CO}_2$  and pC/mol  $\text{H}_2\text{O}$ . They served to identify 1 mol  $\text{CO}_2$ /mol Cys and  $\frac{1}{2}$  mol  $\text{H}_2\text{O}$ /mol Q beyond any doubt. In the absence of primary  $\text{NH}_3$  calibration we had to resort to secondary substances, glutamine, aspartic acid and asparagine, which retained stable  $\text{NH}_3$  and  $\text{H}_2\text{O}$  signals over months. The  $\frac{1}{2}$  mol  $\text{NH}_3$ /mol Q can only come from the glutamine dimer, which implies that also the  $\text{H}_2\text{O}$  signal from glutamine corresponds to  $\frac{1}{2}$  mol  $\text{H}_2\text{O}$ /mol Q. For the other two, the correspondence between 1 mol  $\text{H}_2\text{O}$  and 1 mol  $\text{NH}_3$  is convincing. Thus we had four consistent

reference points:  $\frac{1}{2}$  mol H<sub>2</sub>O and  $\frac{1}{2}$  mol CO<sub>2</sub> from NaHCO<sub>3</sub>, and  $\frac{1}{2}$  mol NH<sub>3</sub> from glutamine, and 1 mol NH<sub>3</sub> from Asparagine.

For each amino acid sample, the ion current is measured individually in each mass channel between 1 and 100 Da in 1 Da intervals. Integration over time (and temperature) gives for each mass the ion charge per mol AA, [C/molAA], and with the four calibrations the final values of mol/molAA. In Figs. 3.2 to 3.4 the ion charges are plotted on the left, the mol amounts on the right. In the graph for 17 Da (Figure 3.2) there appeared a 20  $\mu$ C/mol signal for the reference substance X1. Since this definitely cannot contain NH<sub>3</sub>, a systematic error of 20  $\mu$ C/mol must be present, though the statistical errors are smaller.

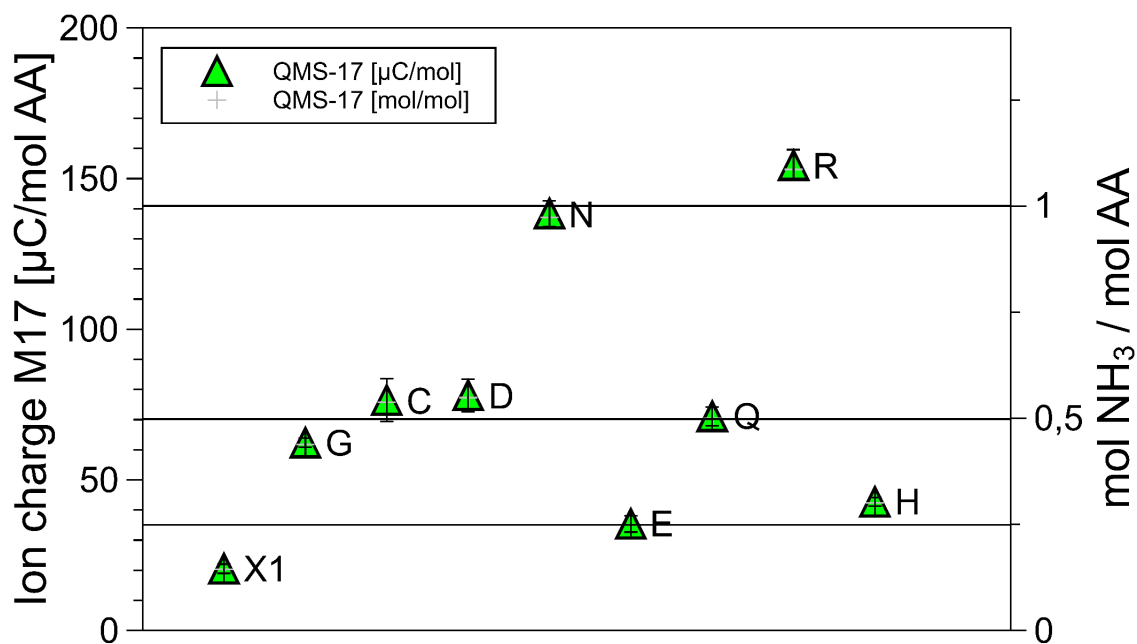

Figure 3.2, Signals in the 17 Da, the NH<sub>3</sub> channel, for each of the amino acids. Ionic charges in the peaks on the left, mol NH<sub>3</sub>/mol amino acid on the right. The clustering of G, C, D, Q around  $\frac{1}{2}$  mol NH<sub>3</sub>/mol AA and of N and R around 1 mol NH<sub>3</sub>/mol AA is striking.



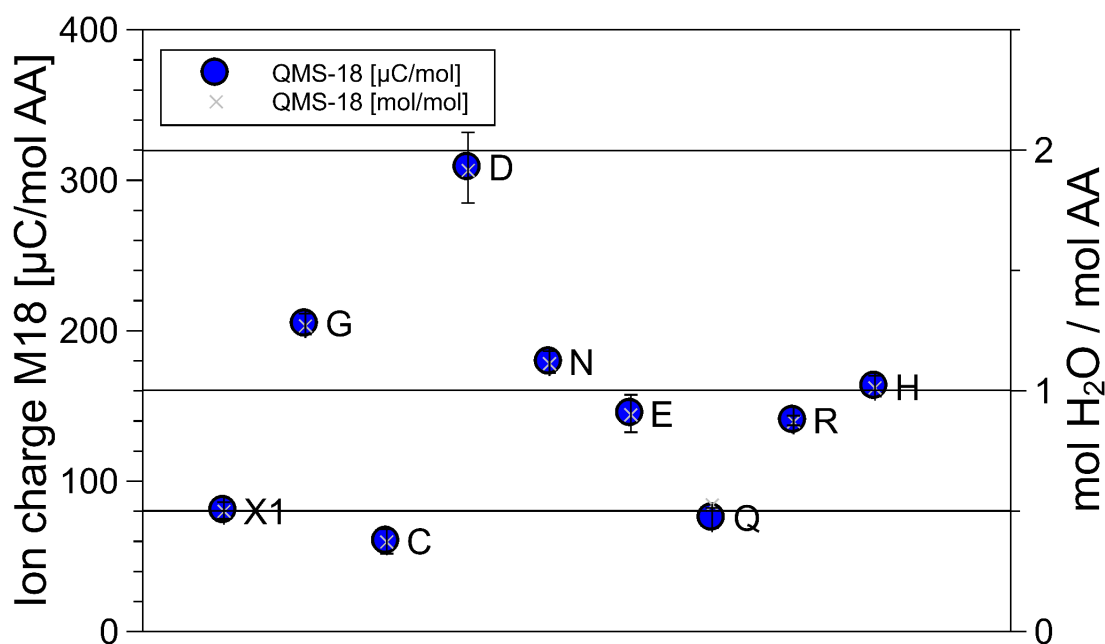

Figure 3.3 Signals in the 18 Da, the H<sub>2</sub>O channel, for each of the amino acids. Ionic charges in the peaks on the left, mol H<sub>2</sub>O/mol amino acid on the right. The clustering of C and Q around the ½ mol H<sub>2</sub>O level, of N, E, R, H around the 1 mol H<sub>2</sub>O level, and the 2 mol point for D are striking.

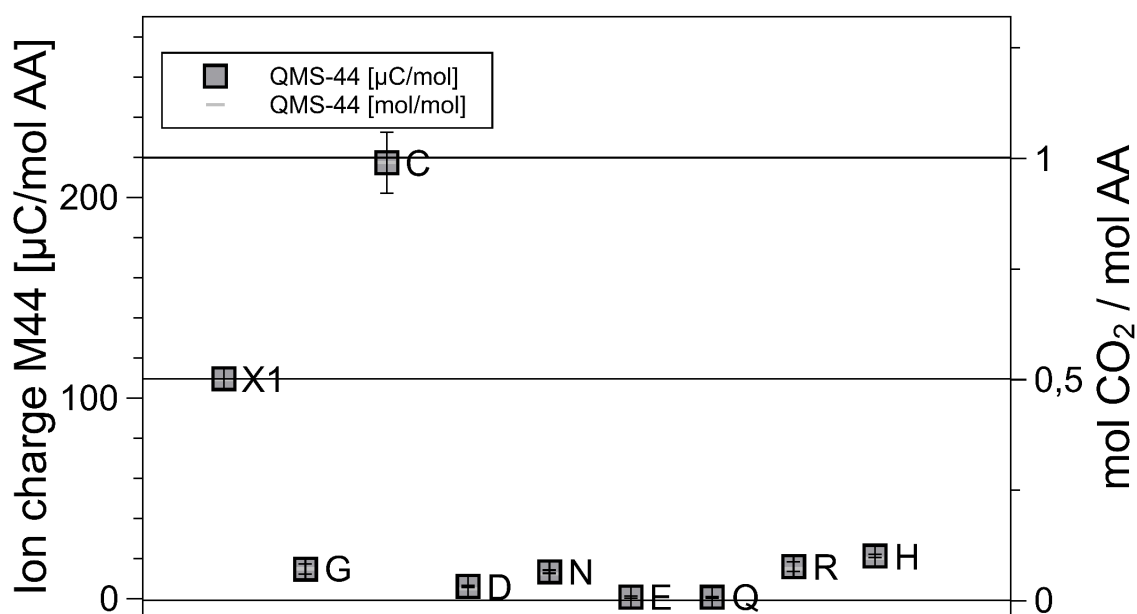

Figure 3.4 Signals in the 44 Da, the CO<sub>2</sub> channel, for each of the amino acids. Ionic charges in the peaks on the left, mol CO<sub>2</sub>/mol amino acid on the right. Only C produces 1 mol CO<sub>2</sub>, the level of the others is negligible.

The absolute ionic currents of Figures 3.2 to 3.4 are equipment dependent and not significant, but the relative values are encouraging. One mol NH<sub>3</sub> produces 12% less and CO<sub>2</sub> 54 % more ions than one mol H<sub>2</sub>O. Indeed the ionization cross sections of NH<sub>3</sub>, H<sub>2</sub>O and CO<sub>2</sub> are reported to be in that order [NIST website, Kim et al.].

| AAA | A | M.W.<br>Da | H <sub>f</sub><br>kJ/mol | T peak<br>°C | H peak<br>kJ/mol | Δ M<br>Da | QMS-17      | QMS-18      | QMS-44      | M (gas)<br>Da | Δ M - M (gas)<br>Da | H res<br>kJ/mol |
|-----|---|------------|--------------------------|--------------|------------------|-----------|-------------|-------------|-------------|---------------|---------------------|-----------------|
| Gly | G | 75         | -529                     | 250          | 64               | 35        | 0,44 ± 0,01 | 1,27 ± 0,04 | 0,07 ± 0,00 | 34            | 1                   | -172            |
| Cys | C | 121        | -534                     | 245          | 94               | 98        | 0,54 ± 0,05 | 0,37 ± 0,05 | 0,99 ± 0,07 | 59            | 39                  | -27             |
| Asn | N | 132        | -789                     | 225          | 118              | 35        | 0,97 ± 0,03 | 1,11 ± 0,05 | 0,06 ± 0,00 | 39            | -4                  | -451            |
| Gln | Q | 146        | -826                     | 185          | 77               | 22        | 0,50 ± 0,02 | 0,53 ± 0,12 | 0,00 ± 0,00 | 18            | 4                   | -675            |
| Asp | D | 133        | -973                     | 256          | 121              | 39        | 0,55 ± 0,04 | 1,92 ± 0,15 | 0,03 ± 0,00 | 45            | -6                  | -473            |
| Glu | E | 147        | -1010                    | 201          | 89               | 20        | 0,25 ± 0,02 | 0,90 ± 0,08 | 0,00 ± 0,00 | 21            | -1                  | -779            |
| Arg | R | 174        | -624                     | 236          | 54               | 47        | 1,09 ± 0,04 | 0,87 ± 0,02 | 0,07 ± 0,01 | 37            | 9                   | -334            |
| His | H | 155        | -467                     | 280          | 82               | 27        | 0,30 ± 0,01 | 1,01 ± 0,04 | 0,10 ± 0,00 | 28            | -1                  | -169            |

Table 1. The first two columns show the names of the amino acids. The third is the heat of formation, H<sub>f</sub>(s) of the solid amino acid. The other columns are experimental data. T<sub>peak</sub> is the temperature of the DSC and QMS peaks, H<sub>peak</sub> is the endothermic peak area, ΔM the mass loss registered by TGA. QMS-17, QMS-18 and QMS-44 are the mol fraction found in QMS for the 17 Da, 18 Da and 44 Da peaks, respectively. From these mol fractions the sum of the gaseous mass, M(gas), is calculated. The last column, ΔM-M(gas), is the difference between the mass loss ΔM measured in TGA, and the mass loss M(gas) calculated from QMS. If there are a, b and c mols of NH<sub>3</sub>, H<sub>2</sub>O and CO<sub>2</sub>, respectively, M(gas) = 17a+18b+44c. The small values of ΔM-M(gas) prove that no gases other than NH<sub>3</sub>, H<sub>2</sub>O and CO<sub>2</sub> evolved (For Cys the mol H<sub>2</sub>S, 34 Da, has been added). The enthalpy of formation of the residue is calculated as H<sub>res</sub> = H<sub>f</sub> – 45a – 242b – 396c.

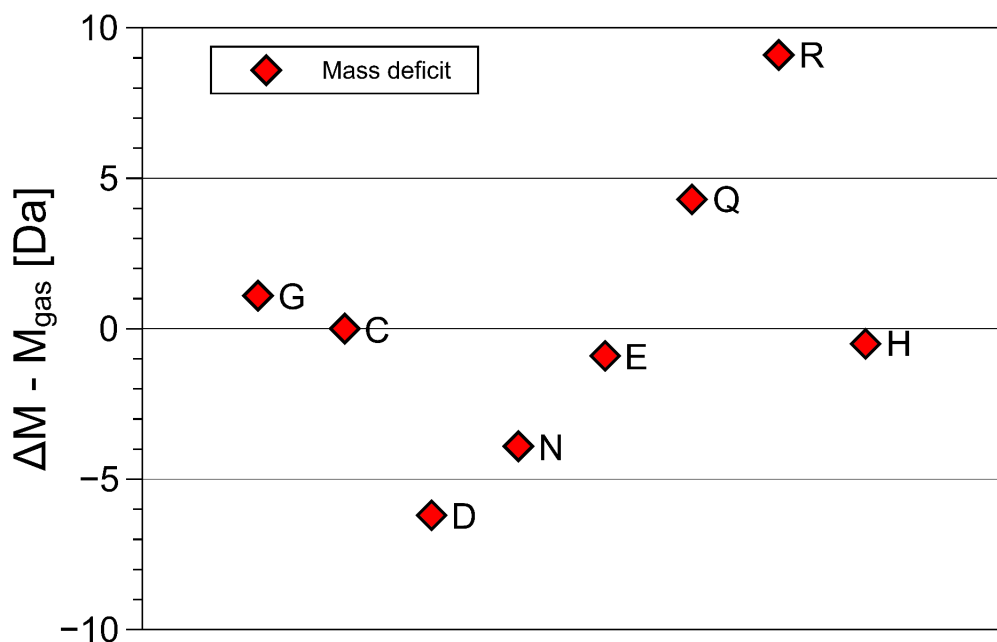

Figure 3.5, The difference between the mass loss registered by TGA,  $\Delta M$  and the volatile mass found as  $\text{NH}_3$ ,  $\text{H}_2\text{O}$ ,  $\text{CO}_2$  and  $\text{H}_2\text{S}$ ,  $\Delta M - M_{\text{gas}}$  remains below  $|9|$  Da. This is confirmation that no other gases are produced.

Figures 3.2 to 3.5 and Table I summarize the experimental data: with the exception of cysteine, thermal decomposition results in three gases, mainly  $\text{H}_2\text{O}$ , less  $\text{NH}_3$  and hardly any  $\text{CO}_2$ . The weight of these three gases adds up to the weight loss registered by TGA, therefore no other gases evolve in appreciable amount – they are not seen in QMS either. The proximity of the molfractions to integer or half-integer values indicates simple decomposition chains. The process causing the peaks cannot be melting (because of the mass loss), nor sublimation (because of the QMS signals). One concludes that amino acids do not exist in liquid or gaseous form. They decompose endothermally, with heats of decomposition between  $-72$  and  $-151$  kJ/mol, at well defined temperatures between  $185^\circ\text{C}$  and  $280^\circ\text{C}$ .

### 3.2 General remarks

These amino acids consist of different side chains attached to the  $\text{C}_\alpha$  of the same backbone,  $\text{NH}_2\text{-C}_\alpha\text{-(C}^*\text{OOH)}$ , but their decomposition chains are quite different. The pyrolytic process is controlled by three balance laws: In terms of Da the masses must add up, chemically the atomic species must balance, and the enthalpy of formation must equal the enthalpies of formation of the products plus the endothermic heat of reaction. The amounts of volatile products are experimental values (TGA and QMS). For the residues only the mass is experimental, their composition is inferred. In section 4 we analyze possible pathways. Although the choices, restricted by compositional, mass and enthalpy considerations, are convincing, they cannot be unique beyond doubt. Alternatives to our proposals, but indistinguishable by us, are

possible. Analyses of the decomposition chains are, therefore, tentative or speculative. Nevertheless, they are less speculative than those of Rodante et al. (1992), who had only TGA and DSC, but no QMS at their disposal. What Acree and Chickos (2010) call "sublimation enthalpies" agree more or less with our decomposition enthalpies. One concludes that they must refer to decomposition, not merely sublimation without composition change.

We use of the enthalpy values listed for standard conditions (Haynes 2013) without minor corrections for specific heats and entropies up to the actual reaction temperatures. Moreover, hydrogen gas escapes our attention, it is too light (2 Da) to be registered in QMS and TGA, nor does it appear in the enthalpy sum, its heat of formation being zero by definition. With exception of hydrogen, the mass balance, controlled by TGA, confirms that beyond the residue and the three gases, nothing else is formed. The real constraint is the enthalpy balance. For the enthalpy balance production of water is necessary. The expression of the formation enthalpies of the 20 amino acids  $\text{CaHbNcOdSe}$  has the least square fit  $H_f(\text{CaHbNcOdSe}) = 30.3a - 37.8n + 16.5c - 182.4d - 71.3e$  [kJ/mol]. The oxygens outweigh the others with  $-182$  kJ/mol. The obvious way of efficiently transferring enthalpy from the reactants to the products is the formation of water, with  $H_f(\text{H}_2\text{O}) = -242$  kJ/mol.

Detailed analysis for each amino acid is helped by preliminary reference to a few reactions possible in principle.  $\text{CO}_2$  production in Cys is obviously a special case. In principle one expects the N-termini to be stable, making desamination to produce  $\text{NH}_3$  unlikely. Nitrogen in the side chains is another matter, indeed the  $\text{NH}_3$  producing Asn and Arg have nitrogen in their side chains. The predominance of  $\text{H}_2\text{O}$  production indicates instability of the C-terminus beyond the  $\text{C}^*$  atom, where dehydration can occur by n-oligomerization, which yields  $(n-1)/n$  mol  $\text{H}_2\text{O}/\text{mol}$  AS, from dimerization for  $n=2$ , to 1 mol  $\text{H}_2\text{O}/\text{mol}$  for  $n \rightarrow \infty$  in polymerization. A special case of dimerization is external cyclization in the diketopiperazine reaction, which yields 1 mol  $\text{H}_2\text{O}/\text{mol}$  AA. These involve joining N- and C- termini in a dehydration reaction. For long side chains also internal cyclization, where the end of the side chain connects to the C-terminus can be envisaged. Integer and half-integer mol values restrict the choice for the residues, but not unequivocally.

#### 4. Data analysis, amino acid by amino acid

All DSC peaks are endothermic, their areas are given negative signs. With this convention endothermic evaporation and exothermic production of water are written as

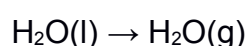

$$\begin{array}{cccc} -285.8 & -241.8 & -44 & \text{kJ/mol,} \end{array}$$

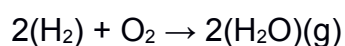

$$\begin{array}{cccc} 0 & 0 & 2(-241.8) & + 2(241.8) \quad \text{kJ} \end{array}$$

## 4.1 Glycine

Glycine, Gly, G,  $C_2H_5NO_2$ , 75 Da,  $H_f = -528$  kJ/mol.

Simple endothermic peak at  $250^\circ\text{C}$ ,  $H_{\text{peak}} = -72.1$  kJ/mol.

The QMS signal of  $3/2$  mol  $H_2O$ /mol Gly plus  $1/2$  mol  $NH_3$ /mol Gly is beyond doubt, it is confirmed by the mass loss of 35 Da/mol Gly. This leaves only 10% of the original hydrogen for the residue. The triple and double bonds in carbon rich  $C_4HNO$ ,  $C_3HNO$  and  $C_2HNO$  preclude them enthalpy wise and make deposition of carbon likely,

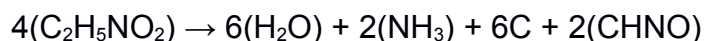

$$\begin{array}{ccccccc} -2112 & & -1452 & & -92 & 0 & 2x & & -288 & \text{kJ,} \end{array}$$

leaving  $-280$  kJ/mol =  $x$  for the moiety  $CHNO$ , which is the composition of the peptide bond. Chemspider lists two symmetric molecules consisting entirely of peptide bonds, 1,3-Diazetidine-2,4-dione,  $C_2H_2N_2O_2$ , chemspider 11593418, 86 Da, (Figure 4.1a) or its isomer 1,2-Diazetidine-3,4-dione,  $C_2H_2N_2O_2$ , chemspider 11383421, 86 Da, Fig 4.1b. The scarcity of hydrogen is such that not even the smallest lactam, 2-Aziridinone,  $C_2H_3NO$ , 57 Da, chemspider 10574050, bp  $57^\circ\text{C}$  (Figure 4.1c) can serve as residue.

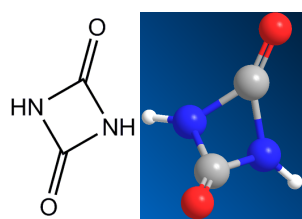

Figure 4.1a, Residue of Gly,  $C_2H_2N_2O_2$ , 1,3-Diazetidine-2,4-dione, 86 Da

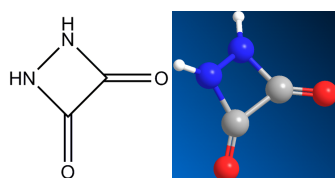

Figure 4.1b, Isomer of 4.1a, 1,2-Diazetidine-3,4-dione, 86 Da

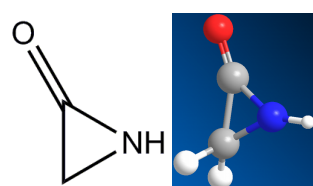

Figure 4.1c, 2-Aziridinone,  $C_2H_3NO$ , 57 Da

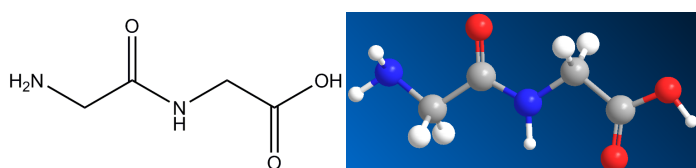

Figure 4.1d, Intermediate dimer, glygly,  $C_4H_8N_2O_3$ , 132 Da.

The simplest pathway seems the formation of linear Glycylglycine, chemspider 10690 (Figure 4.1d), m.p. 255°C (which is  $T_{\text{peak}}$ !)  $\text{C}_4\text{H}_8\text{N}_2\text{O}_3$ ,  $H_f(s) = -748 \text{ kJ/mol}$  [Haynes 2013] from which the central peptide bond  $-(\text{C}=\text{O})-\text{NH}-$  is detached by cutting off the  $\text{NH}_2-\text{C}\alpha-\text{H}_2-$  group on one, and the  $\text{C}\alpha-\text{H}_2-\text{C}^*\text{OOH}$  group on the other side. The former makes  $\text{NH}_3$  plus C, the latter makes 2C plus  $2(\text{H}_2\text{O})$ . This process is specific for the glycine dimer, in which the  $\text{C}\alpha$  atoms are not protected by proper sidechains, they are just  $-\text{C}\alpha-\text{H}_2-$  units. This pathway to shear peptide bonds is of interest in the context of possible peptide nucleic acid (PNA) synthesis [Banack et al. 2012] via N-2-aminoethylglycine (AEG),  $\text{C}_4\text{H}_{10}\text{N}_2\text{O}_2$ , chemspider 379422, which is deoxidized diglycine,  $2\text{Gly} \rightarrow \text{O}_2 + \text{AEG}$ .

## 4.2 Cysteine

Cysteine, Cys, C,  $\text{C}_3\text{H}_7\text{NO}_2\text{S}$ : 121 Da,  $H_f = -534 \text{ kJ/mol}$ .

$T_{\text{peak}} = 221^\circ\text{C}$  with a mass loss of 98 Da,  $H_{\text{peak}} = -96 \text{ kJ/mol}$ .

The clear 1 mol  $\text{CO}_2$  signal leaves no oxygen to form  $\text{H}_2\text{O}$ , therefore the spurious 18 Da line must stem from a systematic error. There is also  $\frac{1}{2}$  mol  $\text{NH}_3/\text{molCys}$ . For  $\text{H}_2\text{S}$  there is indeed a signal at 34 Da. It corresponds to 1 mol, because the ionization cross sections of  $\text{H}_2\text{S}$  and  $\text{H}_2\text{O}$  are nearly identical, so that the calibration of Figure 3.3 applies. The mass loss of  $44+34+8.5 = 70\%$  of 121 Da agrees with TGA.

Chemical analysis found no sulfur in the residue. No possibility for forming disulfide bridges between molecules is left. Neither COS nor  $\text{CS}_2$  was found. The total reaction is

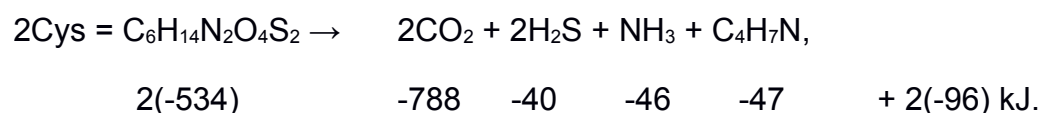

On the left -1068, on the right -1113 kJ. Pathway to the formation of  $\text{C}_4\text{H}_7\text{N}$  might be ejection of the carboxyl group  $-\text{C}^*\text{OOH}$  and the  $-\text{SH}$  group from Cys, the remaining chain  $\text{NH}_2-\text{C}\alpha-\text{C}^*$  is too short for internal, but suitable for external cyclization. Two of these form the asymmetric 5-ring (3-pyrrolidinamine, 144134), Figure 4.2a, from which the  $-\text{NH}_2$  is cut off. Indeed the  $\frac{1}{2}$   $\text{NH}_3$  ejected confirms such dimerization. That leaves the molecule  $\text{C}_4\text{H}_7\text{N}$ : 2,5-Dihydro-1H-pyrrole, chemspider 13870958, b.p.  $90^\circ\text{C}$ , 69 Da,  $H_f(s)=-46.6\text{kJ/mol}$  (Figure 4.2b), or another pyrroline, with the double bond elsewhere in the ring. Indeed there is heavy boiling beyond the peak. In view of the richness in hydrogen, several small hydrocarbon lines are not surprising.

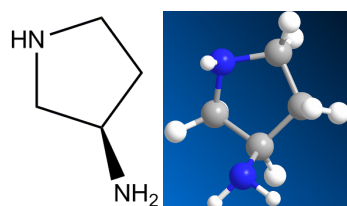

Figure 4.2a, Intermediate compound: 3-pyrrolidinamine, chemspider 144134, 86 Da.

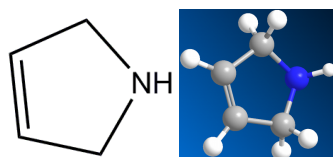

Figure 4.2b, Residue of Cys,  $C_4H_7N$ , 2,5-Dihydro-1H-pyrrole, chemspider 13870958, 69 Da.

### 4.3 Aspartic acid

Aspartic acid, Asp, D,  $C_4H_7NO_4$ : 133 Da,  $H_f = -973$  kJ/mol.

DSC shows two distinct peaks, at  $230^\circ\text{C}$  and at  $250^\circ\text{C}$ , in each of which 1 mol  $H_2O$ /mol Asp is ejected. The endothermic heats are  $-64$  and  $-61$  kJ/mol, respectively. Stays powder up to  $294^\circ\text{C}$ , i.e. solid/solid transformation in peak. The reaction

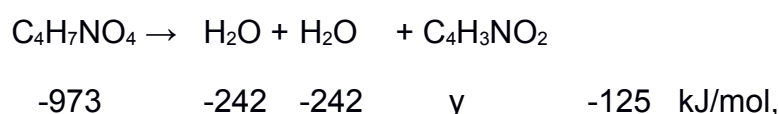

with calculated  $y = -364$  kJ/mol, which is reasonable for the formation enthalpy of the polysuccinimide unit (PSI). The molecular weight of  $C_4H_3NO_2$  is 97 Da.

The compound  $(C_4H_3NO_2)_n$  is polysuccinimide. The two peaks prove that the reaction occurs in two steps, in the first at  $230^\circ\text{C}$  the condensation reaction produces polyaspartic acid,  $Asp \rightarrow H_2O + \text{poly-Asp}$ , in the second at  $250^\circ\text{C}$  the poly-Asp degrades to polysuccinimide (PSI) by ejection of another 1 mol  $H_2O$ /mol Asp. Such a reaction was reported by Schiff [1897]. The molecule drawn is beta-poly-Asp, there is an isomer, alpha-poly-Asp, where the next C in the ring forms a bond to its neighbor. We have no possibility to decide between the two.

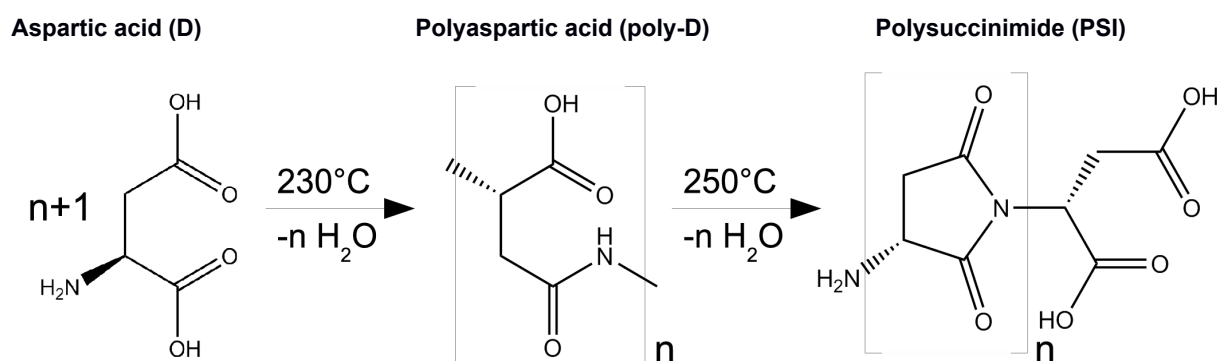

Figure 4.3, The pathway from Aspartic acid (D) to polysuccinimide (PSI). Compared with succinimide, the N-C bond in polysuccinimide economizes two hydrogen atoms.

### 4.4 Asparagine

Asparagine, Asn, N,  $C_4H_8N_2O_3$ : 132 Da,  $H_f = -789$  kJ/mol.

In the broad peak at 232°C, 1 mol H<sub>2</sub>O /mol Asn and 1mol NH<sub>3</sub>/mol Asn are ejected. H<sub>peak</sub>= - 122 kJ/mol. The product stays a white powder up to 265°C, i.e. there is a solid/solid transformation in the reaction

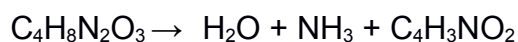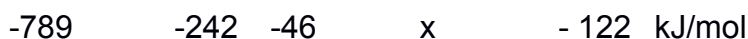

with calculated  $x = -379$  kJ/mol. In the Asp decomposition, H<sub>f</sub>(C<sub>4</sub>H<sub>3</sub>NO<sub>2</sub>) was calculated as  $y = -364$  kJ/mol. The two values agree, although because of their histories, the two PSI are not identical. If Asn followed the example of Asp, it would eject 1mol H<sub>2</sub>O /mol Asn in the condensation reaction, Asn → H<sub>2</sub>O + poly-N, followed by degradation of poly-N to polysuccinimide (PSI) by ejection of 1mol NH<sub>3</sub>/mol Asn. If, however, the H<sub>2</sub>O of the condensation reaction is not ejected but retained, it can replace the –NH<sub>2</sub> in poly-N by –OH. According to Asn → NH<sub>3</sub> + poly-D this amounts to the formation of polyaspartic acid from asparagine by ejection of NH<sub>3</sub>. The poly-D then degrades to polysuccinimide(PSI) by ejection of 1mol H<sub>2</sub>O /mol Asn. Apparently both alternatives occur and there is one broad peak containing both NH<sub>3</sub> and H<sub>2</sub>O.

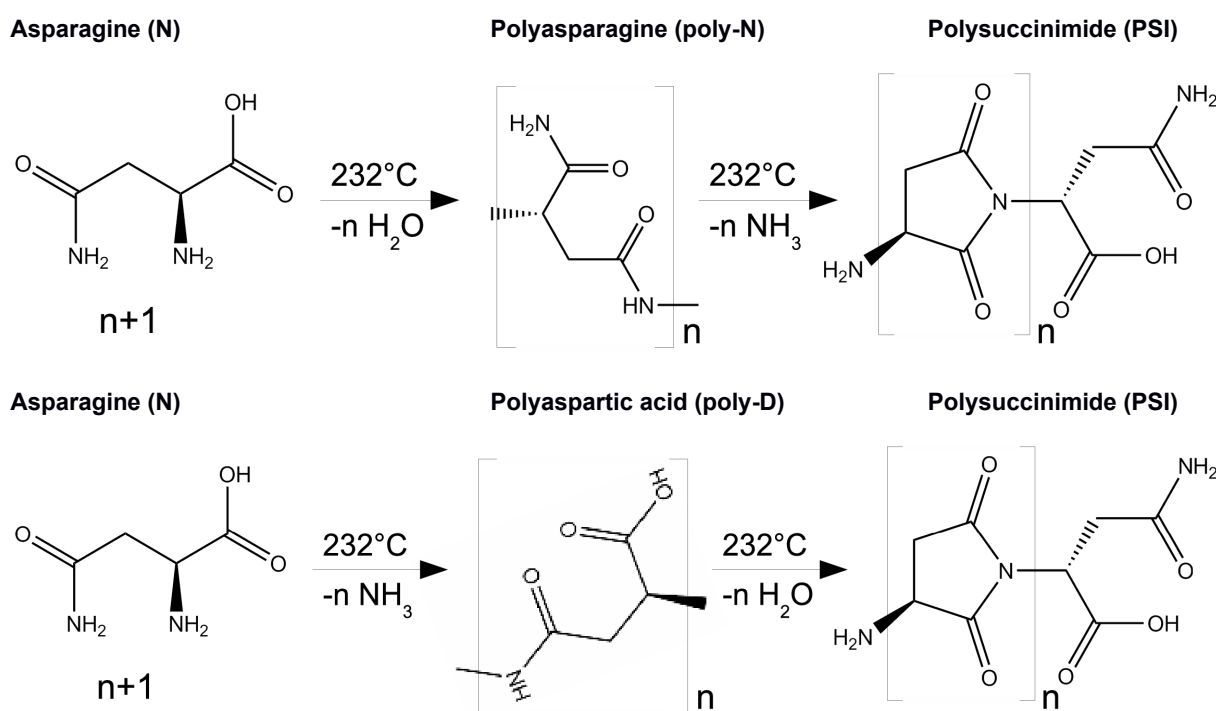

Figure 4.4, Two pathways from asparagine (N) to polysuccinimide (PSI): either through polyasparagine (poly-N) or polyaspartic acid (poly-D). Compared with succinimide, the N-C bond in polysuccinimide economizes two hydrogen atoms.

Though the formulae for PSI formed from Asp and from Asn, are the same, (C<sub>4</sub>H<sub>3</sub>NO<sub>2</sub>)<sub>n</sub>, these two residues need not be identical. For kinetic reasons the oligomerization or polymerization might have proceeded to different lengths in poly-Asp and poly-Asn, therefore the degraded products PSI might have different lengths, with different stabilities and melting points. Moreover, the telomers are different, –OH for PSI from Asp and –NH<sub>2</sub> for PSI from Asn. Indeed PSI from Asp remains a white powder up to 289°C, while PSI from Asn starts melting at 289°C.



## 4.5 Glutamic acid

Glutamic acid, Glu, E,  $C_5H_9NO_4$ : 147 Da,  $H_f = -1097$  kJ/mol;  $T_{peak} = 200^\circ C$ ,  $H_{peak} = -88$  kJ/mol.

At  $200^\circ C$ , 1 mol  $H_2O$  /mol Glu is seen in QMS, the DSC area is -121 kJ/mol, mass loss in the peak is 12% (17 Da). The dehydration of Glu has been known for a long time [Haitinger, L., Vorlaeufige Mittheilung uber Glutaminsaeure und Pyrrol. Monatsh. Chem., 1882, 3, 228–229].

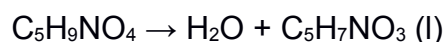

$$1097 \quad -242 \quad \times \quad -121 \text{ kJ/mol,}$$

with calculated  $x = -734$  kJ/mol for  $H_f(C_5H_7NO_3)$ , pyroglutamic acid, chemspider 485, 129 Da,  $T_m = 184^\circ C$ , b.p. =  $433^\circ C$ .

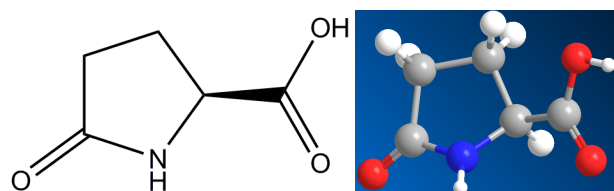

Figure 4.5a, The final residue of Glu, pyroglutamic acid,  $C_5H_7NO_3$ , 129 Da.

This lactam is biologically important, but its enthalpy of formation is apparently not known. Known is the  $H_f(s) = -459$  kJ/mol and  $H_f(g) = -375$  kJ/mol for  $C_4H_5NO_2$ , succinimide, 99 Da, the five ring with  $O=$  and  $=O$  as wings (the structure is like pyroglutamic acid, but with the carboxyl group  $-COOH$  replaced by  $=O$ ).

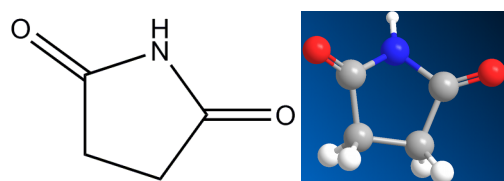

Figure 4.5b, Succinimide,  $C_4H_5NO_2$ , 99 Da.

The additional O should add about -200 kJ/mol, which makes the -734 kJ/mol for pyroglutamic acid plausible. The TGA weight loss beyond the peak is evaporation. Pyroglutamic acid is formed by inner cyclization of E: after the  $-OH$  hanging on  $C_\delta$  is ejected, the  $C_\delta$  joins the  $-NH_2$  hanging on  $C_\alpha$ . This was suggested by Mosqueira et al. [2008], ours is the first experimental evidence for this process.

Since QMS does not show any  $CO_2$ , the reaction to  $C_4H_7NO$ , the lactam pyrrolidone, 85 Da,  $T_m = 25^\circ C$ , b.p. =  $245^\circ C$ ,  $H_f(l) = -286$  kJ/mol, yellow liquid, can be ruled out, although cutting off the  $CO_2$  is sterically tempting.

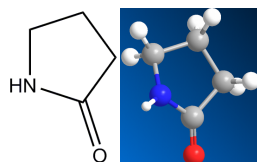

Figure 4.5c, Pyrrolidone,  $C_4H_7NO$ , 85 Da.

## 4.6 Glutamine

Glutamine, Gln, Q,  $C_5H_{10}N_2O_3$ : 146 Da,  $H_f = -826$  kJ/mol.

The precise half mol fractions of  $H_2O$  and  $NH_3$  in the peak at  $T_{peak} = 185^\circ C$ ,  $H_{peak} = -77$  kJ/mol, indicate that a dimer serves as intermediate step, gamma-glutamylglutamine,  $C_{10}H_{17}N_3O_6$ , chemspider 133013, b.p.  $596^\circ C$ :

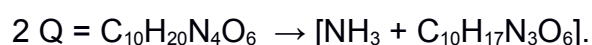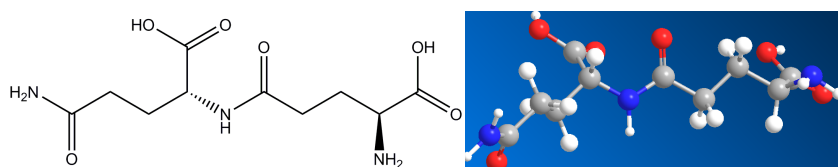

Figure 4.6a, Intermediate step, gamma-glutamylglutamine,  $C_{10}H_{17}N_3O_6$ , 275 Da..

After further ejection of  $H_2O$  the total reaction is

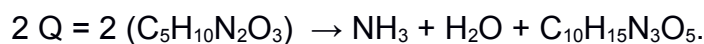

Chemspider lists for the residue a suitable molecule, 9185807, 5-Oxo-L-prolyl-L-glutamine,  $C_{10}H_{15}N_3O_5$ , 257 Da, b.p.  $817^\circ C$ ,  $H_{vap} = 129$  kJ/mol.

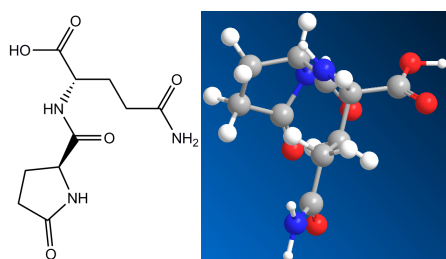

Figure 4.6b, The residue of Gln: 5-Oxo-L-prolyl-L-glutamine,  $C_{10}H_{15}N_3O_5$ , 257 Da.

Above the peak at  $185^\circ C$  optical observations show indeed a nonboiling liquid, agreeing with the high boiling point quoted.

## 4.7 Arginine

Arginine, Arg, R:  $C_6H_{14}N_4O_2$ : 174 Da,  $H_f = -623$  kJ/mol.

A small peak without mass loss at  $220^\circ C$ ,  $-14$  kJ/mol, and a main peak at  $230^\circ C$ ,  $-52$  kJ/mol, producing 1 mol  $NH_3$  plus 1 mol  $H_2O$  in QMS, confirmed by the weight loss of

20% of 174 Da in TGA. The precursor peak without mass loss at 220°C, -14 kJ/mol, probably comes from a rearrangement in the guanidine star. In the large peak a double internal cyclization occurs. The loss of the amino group –NH<sub>2</sub> in the backbone, and internal cyclization joining the N next to the C<sub>δ</sub> in the side chain to C<sub>α</sub>,

$C_6H_{14}N_4O_2 \rightarrow NH_3 + C_6H_{11}N_3O_2$ , forms an intermediate, 1-Carbamimidoylproline, 157 Da, chemspider 478133.

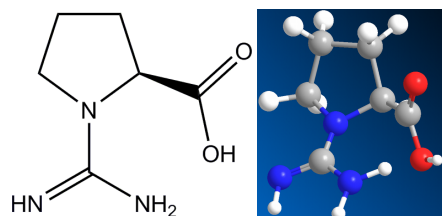

Figure 4.7a, 1-Carbamimidoylproline, 157 Da, representing the intermediate step after ejection of NH<sub>3</sub> from Arg.

It is called “..proline”, because the ring is spanned between an N and C<sub>α</sub>, though the N is not from the backbone. By losing the –OH and a second inner cyclization joining the =NH or the –NH<sub>2</sub> to C\*, one or the other tautomer of the final residue is formed. The total reaction is  $C_6H_{14}N_4O_2 \rightarrow NH_3 + H_2O + C_6H_9N_3O$ , not quoted in chemspider:

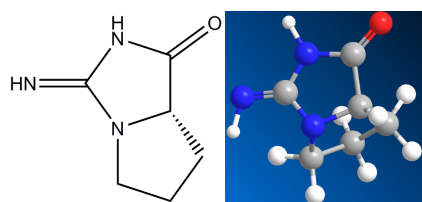

Figure 4.7b, The final residue of Arg, C<sub>6</sub>H<sub>9</sub>N<sub>3</sub>O, 139 Da, “creatine-proline”. The creatine ring on top joins the proline ring.

This final residue is remarkable. It contains the proline ring, the guanidine star and a peptide bond in the ring of creatinine, which is the 5-ring with the =O and =OH double bonds. Creatinine, H<sub>f</sub> = -240 kJ/mol, m.p. 300°C, C<sub>4</sub>H<sub>7</sub>N<sub>3</sub>O, chemspider 568, has several tautomeric forms. The end product in question might contain either of those rings. We have no way to decide between the alternatives, but a double ring structure seems likely.

#### 4.8 Histidine

Histidine, His, H, C<sub>6</sub>H<sub>9</sub>N<sub>3</sub>O<sub>2</sub>: 155 Da, H<sub>f</sub> = -466 kJ/mol.

The QMS results are clear, His ejects 1 mol H<sub>2</sub>O in the reaction

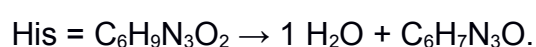

The observed 1mol H<sub>2</sub>O /mol His, confirmed by the weight loss of 13% of 155 Da, could stem from the condensation reaction of polymerization, but the volatility seen optically contradicts this option.

Inner cyclization seems likely. If the C\* of the backbone joins the C of the imidazole ring, with =O and –NH<sub>2</sub> attached outside, the 5-ring formed joins the 5-ring of the imidazole. The proposed structure would be

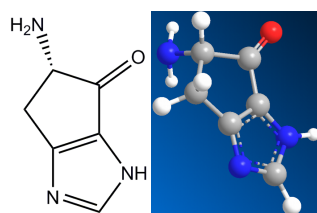

Figure 4.8, Final residue of His, C<sub>6</sub>H<sub>9</sub>N<sub>3</sub>O, 139 Da, consisting of two 5-rings: 2-amino-2,4-cyclopentadien-1-one (C<sub>5</sub>H<sub>5</sub>NO, chemspider 28719770) and imidazole.

Molport quotes this structure, but with the pyrazole ring (where the two N are nearest neighbours) instead of the imidazole ring (where the two N are next nearest neighbours): 5-amino-4H,5H,6H-pyrrolo[1,2-b]pyrazol-4-one, Molport-022-469-240. Parting the nitrogens is energetically favorable: for pyrazole H<sub>f</sub>(s) = +105 kJ/mol, H<sub>f</sub>(g) = +179 kJ/mol; for imidazole H<sub>f</sub>(s) = +49 kJ/mol, H<sub>f</sub>(g) = +132.9 kJ/mol [Haynes 2013]. Moreover, the original His has an imidazole and not a pyrazole ring, and so does the residue.

## 5. Discussion

**Entropy of decomposition:** In the tables of Domalski [1972], Chickos and Acree [2002] and Acree and Chickos [2010], at temperatures coinciding with our peak temperatures, “Heats of sublimation” of the order of our endothermic peak areas are reported. Our QMS signals prove that chemical decomposition is involved, but that should have been obvious from the DSC data alone. The average of the entropies of transformation,  $S_{\text{peak}} = H_{\text{peak}}/T_{\text{peak}}$ , is 215 J/Kmol, way above the usual entropies of melting (22 J/kmol for H<sub>2</sub>O, 28 for NaCl, 36 for C<sub>6</sub>H<sub>6</sub>), and higher than typical entropies of evaporation (41 J/Kmol for H<sub>2</sub>O, 29 for CS<sub>2</sub>, 23 for CO<sub>2</sub>, 21 for NH<sub>3</sub>). The endothermic heats in the peaks are therefore neither enthalpies of fusion nor enthalpies of sublimation, they are heats of reaction accompanied by phase changes. There is transformation and decomposition, but no reversible melting. Amino acids are stable in solid form, but not as liquids or gases.

**Peptide bond formation:** Five of the eight amino acids have residues containing peptide bonds, –C(=O)-NH–, only Asp and Asn leave polysuccinimide (PSI), Cys leaves cyclic pyrrolines. The preponderance of water in thermal decomposition is not surprising. In natural protein formation, each participating amino acid suffers damage. In the condensation reaction, where the N-terminus of one molecule reacts with the C-terminus of its neighbour, the planar peptide bond –C<sub>α</sub>-CO-N-C<sub>α</sub>– is formed. The N-atoms on, and the keto-bound O-atoms off the backbones retain their position. H<sub>2</sub>O is ejected, but neither NH<sub>3</sub> nor CO<sub>2</sub> are produced in protein formation. Thermal decomposition of amino acids is analogous. In protein formation, the endothermic heat is provided by ATP, in amino acid decomposition it is thermal energy.

|                     |                                                                                                                                                                                       |                                                                                     |                                                                                                                                                                                           |
|---------------------|---------------------------------------------------------------------------------------------------------------------------------------------------------------------------------------|-------------------------------------------------------------------------------------|-------------------------------------------------------------------------------------------------------------------------------------------------------------------------------------------|
| 2 H <sub>2</sub> O  |                                                                                                                                                                                       | 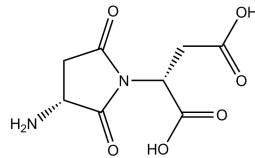   |                                                                                                                                                                                           |
| 1½ H <sub>2</sub> O |                                                                                                                                                                                       |    |                                                                                                                                                                                           |
| 1 H <sub>2</sub> O  | <p>E</p>  <p>H</p>  |                                                                                     | <p>N</p>  <p>R</p>  |
| ½ H <sub>2</sub> O  |                                                                                                                                                                                       |   |                                                                                                                                                                                           |
| 0 H <sub>2</sub> O  |                                                                                                                                                                                       |  |                                                                                                                                                                                           |
|                     | 0 NH <sub>3</sub>                                                                                                                                                                     | ½ NH <sub>3</sub>                                                                   | 1 NH <sub>3</sub>                                                                                                                                                                         |

Figure 5, All residues are obtained by ejection of 0, ½, 1, 1 ½ or 2 mols of H<sub>2</sub>O or NH<sub>3</sub>, placing them on two axes. All residues contain either 0, ½ or 1 mol NH<sub>3</sub> or H<sub>2</sub>O, placing them on two axes. Most of them contain peptide bonds. The polysuccinimide of D and N is an exception, cysteine, for lack of oxygen, the other.

**Peak areas:** Quantitatively, the parallel between protein formation and pyrolysis is confirmed on the enthalpy level. In the formation of a dipeptide,  $X+Y \rightarrow H_2O + (X/Y)$ , the difference between the enthalpies of the reactants and the products go into the formation of the peptide bond:  $H_f(X) + H_f(Y) = -242 \text{ kJ} + H_f(X/Y) + H(\text{PB})$ . With the tabulated value [Haynes 2013, Domalski 1972] for  $H_f(X)$ ,  $H_f(Y)$  and  $H_f(X/Y)$  one calculates  $H(\text{PB}) = -67 \text{ kJ}$  in glycylglycine,  $-70 \text{ kJ}$  in alanylglycine,  $-43 \text{ kJ}$  in serylserin,  $-78 \text{ kJ}$  in glycylvaline,  $-65 \text{ kJ}$  in leucylglycine,  $-91/2 \text{ kJ}$  in triglycylglycine,  $-86/2 \text{ kJ}$  in

leucylglycylglycine, and -58 kJ in glycyphenylalanine. The average value is  $-59 \pm 13$  kJ per peptide bond. The narrow standard deviation indicates that the enthalpy of forming a peptide bond is insensitive to its environment, therefore the endothermic values of oligomerization or polymerization should be close to this.

One concludes that the formation of a peptide bond in a linear dimer is endothermic with an enthalpy of  $59 \pm 13$  kJ. It is tempting to compare this with the areas of the DSC peak, the observed endothermic heat of the decomposition reaction. The average of the eight amino acids is  $-105 \pm 27$  kJ/mol. One concludes that essentially the endothermic heat of decomposition, the peak area, goes into peptide bond formation.

**NH<sub>3</sub> Production:** In cases where the N-terminus, untouched by the condensation, remains attached to a cyclic product, it could be cut off as NH<sub>3</sub>, contributing up to  $\frac{1}{2}$  mol NH<sub>3</sub>/mol AA.

Remarkable is the absence of methane (CH<sub>4</sub>, 16 Da), hydrogen cyanide (HCN, 27 Da) and formamide (CH<sub>3</sub>NO, 45 Da), all in mass channels where we would have seen them. These, suspected in prebiotic synthesis of amino acids, do not appear in their decomposition.

Although at most only three molecules are involved, two gases and one monomolecular residue, identification of the structure of the latter is not unequivocal, there remain more or less probable other possibilities than our choices. Clearly, without QMS, data from DSC and TGA could not possibly suffice to identify decomposition chains.

## 6. Conclusion

Amino acids decompose thermally, they do not sublime, nor do they melt. Only three gases are formed, mostly H<sub>2</sub>O, less so NH<sub>3</sub> and hardly any CO<sub>2</sub>. In all amino acids investigated, Gly, Cys, Asn, Asp, Gln, Glu, Arg, His, the liquid or solid residues are lactams and heterocyclic compounds with 5- or 6-membered non- (or only partially) aromatic rings, containing one or two nitrogen atoms (pyrrolidines, piperidines, pyrrolidines, piperazines), most of them with peptide bonds present.

## Acknowledgements

We thank Angela Rutz and Frederik Schweiger for technical assistance. This work would have been impossible without the continuous support of Eduard Arzt.

## References

- Acree W, Chickos JS (2010) Phase Transition Enthalpy Measurements of Organic and Organometallic Compounds. Sublimation, Vaporization and Fusion Enthalpies From 1880 to 2010. J Phys Chem Ref Data 39
- Acree W, Chickos JS (2016) Phase Transition Enthalpy Measurements of Organic and Organometallic Compounds. Sublimation, Vaporization and Fusion Enthalpies From 1880 to 2015. Part 1. C-1-C-10. J Phys Chem Ref Data 45
- Banack SA, Metcalf JS, Jiang LY, Craighead D, Ilag LL, Cox PA (2012) Cyanobacteria Produce N-(2-Aminoethyl)Glycine, a Backbone for Peptide Nucleic Acids Which May Have Been the First Genetic Molecules for Life on Earth. Plos One 7
- Chickos JS, Acree WE (2002) Enthalpies of sublimation of organic and organometallic compounds. 1910-2001. J Phys Chem Ref Data 31: 537-698
- Domalski ES (1972) Selected Values of Heats of Combustion and Heats of Formation of Organic Compounds Containing the Elements C, H, N, O, P, and S. J Phys Chem Ref Data 1: 221-277
- Follmann H, Brownson C (2009) Darwin's warm little pond revisited: from molecules to the origin of life. Naturwissenschaften 96: 1265-1292
- Haitinger L (1882) Vorläufige Mittheilung über Glutaminsäure und Pyrrol. Monatshefte für Chemie und verwandte Teile anderer Wissenschaften 3: 228-229
- Haynes WM (2013) Section 5: Standard Thermodynamic Properties of Chemical Substances. In CRC Handbook of Chemistry and Physics, Boca Raton, FL, USA: CRC Press, Taylor and Francis Group
- Kim et al (2017) Electron-Impact Cross Section Database; <http://physics.nist.gov/PhysRefData/ASD/ionEnergy.html>. In Gaithersburg, MD, USA: NIST
- Mosqueira FG, Ramos-Bernal S, Negrón-Mendoza A (2008) Prebiotic thermal polymerization of crystals of amino acids via the diketopiperazine reaction. Biosystems 91: 195-200
- Rodante F, Marrosu G, Catalani G (1992) Thermal-Analysis of Some Alpha-Amino-Acids with Similar Structures. Thermochim Acta 194: 197-213
- Schiff H (1897) Ueber Polyaspartsäuren. Berichte der deutschen chemischen Gesellschaft 30: 2449-2459
